# Supplementary material for: A dual approach to cancer treatment: gold(i) terpyridine derivatives as DNA binders and inhibitors of mammalian thioredoxin reductase
Source: Royal Society of Chemistry journal article supplement (doi:10.1039/d4qi00755g), 2024-01-01
Supplement: d4qi00755g1.pdf [file d4qi00755g1.pdf]

## Supporting Information

### **A Dual Approach to Cancer Treatment: Gold(I) Terpyridine Derivatives as DNA Binders and Inhibitors of Mammalian Thioredoxin Reductase**

María Gil-Moles,<sup>[a,b,c]</sup> M. Elena Olmos<sup>[b]</sup>, José M. López-de-Luzuriaga<sup>\*[b]</sup>, Ingo Ott<sup>\*[c]</sup> and M. Concepción Gimeno<sup>\*[a]</sup>

[a] Departamento de Química Inorgánica, Instituto de Síntesis Química y Catálisis Homogénea (ISQCH), CSIC-Universidad de Zaragoza, 50009 Zaragoza, Spain  
E-mail: [gimeno@unizar.es](mailto:gimeno@unizar.es)

[b] Departamento de Química, Universidad de La Rioja. Instituto de Investigación en Química (IQUR). Complejo Científico-Tecnológico, 26004-Logroño, Spain.

E-mail: [josemaria.lopez@unirioja.es](mailto:josemaria.lopez@unirioja.es)

[c] Institute of Medicinal and Pharmaceutical Chemistry, Technische Universität Braunschweig, Beethovenstr. 55, 38106 Braunschweig, Germany

E-mail: [ingo.ott@tu-bs.de](mailto:ingo.ott@tu-bs.de)

### **Table of contents**

|   |                                                                                                |
|---|------------------------------------------------------------------------------------------------|
| 1 | <sup>1</sup> H-NMR and <sup>31</sup> P{ <sup>1</sup> H} NMR: Figures S1-S9                     |
| 2 | Stability studies Figures: S10-S18                                                             |
| 3 | Ligand exchange reactions <sup>1</sup> H-NMR and <sup>31</sup> P{ <sup>1</sup> H} NMR: S19-S23 |
| 4 | DNA-Binding Figures: S24-S28                                                                   |
| 5 | Flow cytometry: S29-S31                                                                        |

1  $^1\text{H-NMR}$  and  $^{31}\text{P}\{^1\text{H}\}$  NMR Figures S1-S8

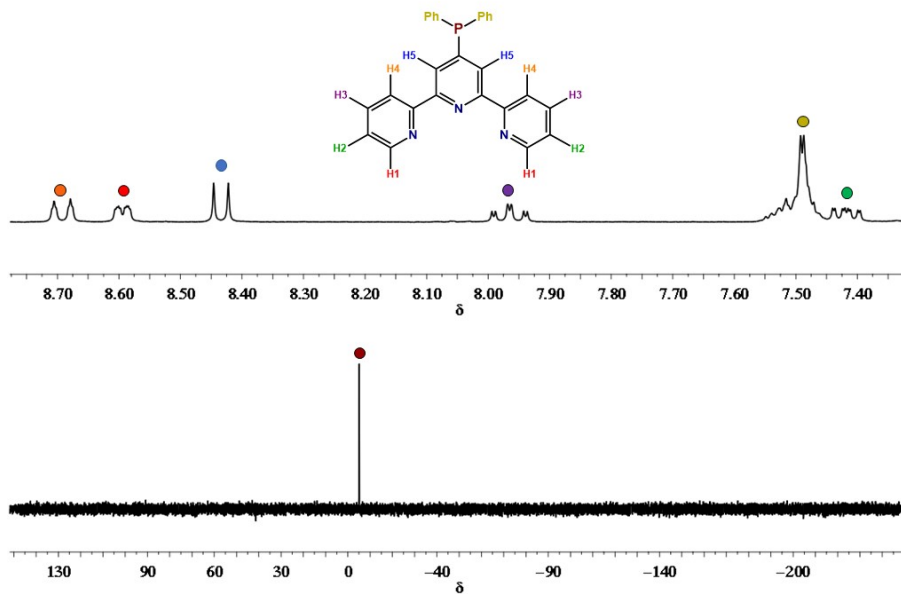

Figure S1:  $^1\text{H-NMR}$  (400 MHz  $d_6-(\text{CH}_3)_2\text{O}$ ). (up) and  $^{31}\text{P}\{^1\text{H}\}$ -NMR (162 MHz  $d_6-(\text{CH}_3)_2\text{O}$ ) (bottom) of 4'-PPh<sub>2</sub>terpy

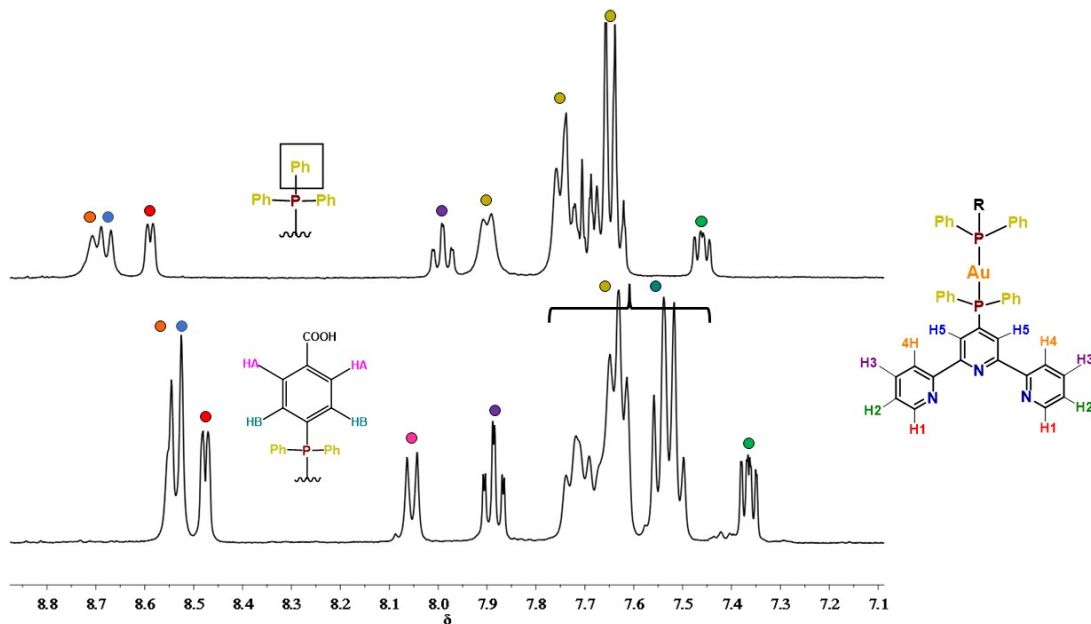

Figure S2:  $^1\text{H-NMR}$  (400 MHz,  $d_6-(\text{CH}_3)_2\text{O}$ ) of 1 (up) and 2 (bottom).

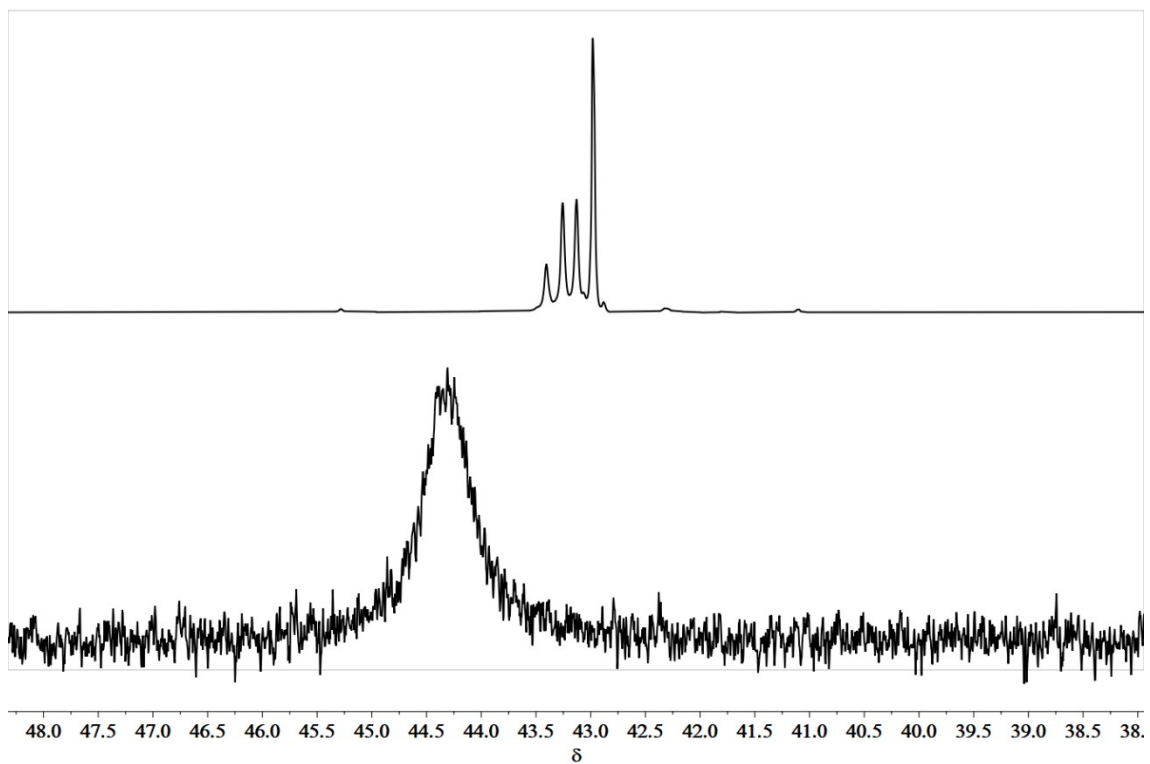

**Figure S3:**  $^{31}\text{P}\{^1\text{H}\}$ -RMN (162 MHz  $\text{d}_6$ - $(\text{CH}_3)_2\text{O}$ ) of **1** at 220K (up) and **1** at 298K (bottom).

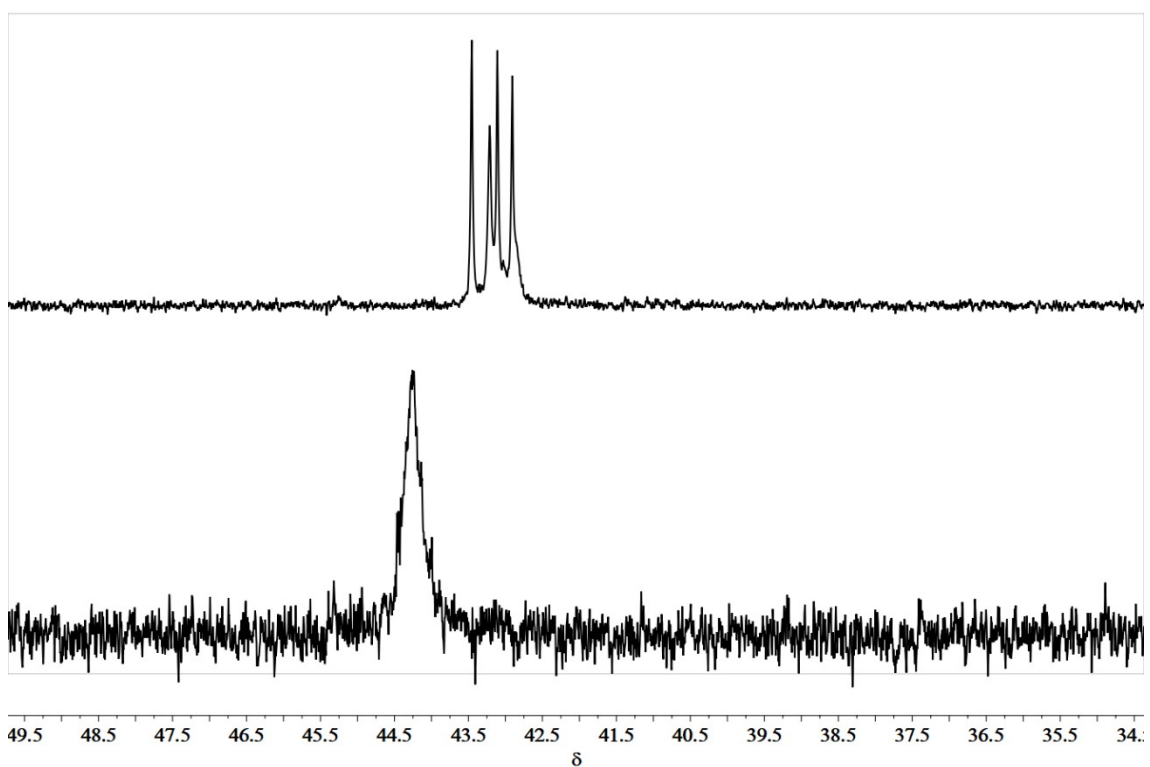

**Figure S4:**  $^{31}\text{P}\{^1\text{H}\}$ -RMN (162 MHz  $\text{d}_6$ - $(\text{CH}_3)_2\text{O}$ ) of **2** at 220K (up) and **2** at 298K (bottom).

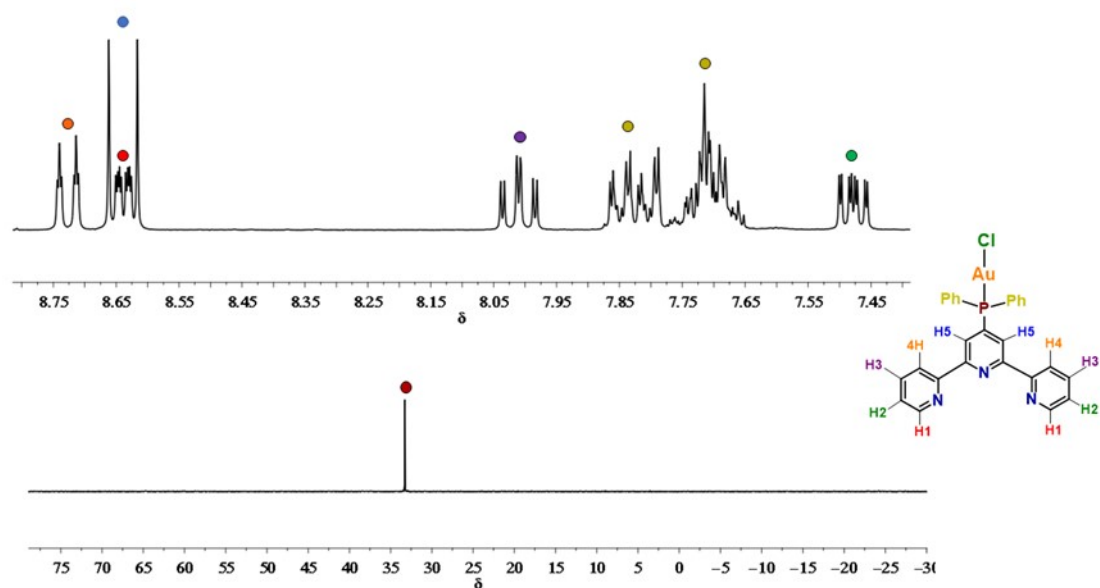

**Figure S5:**  $^1\text{H}$ -RMN (400 MHz  $d_6$ - $(\text{CH}_3)_2\text{O}$ ). (up) and  $^{31}\text{P}\{^1\text{H}\}$ -RMN (162 MHz  $d_6$ - $(\text{CH}_3)_2\text{O}$ ) (bottom) of **3**.

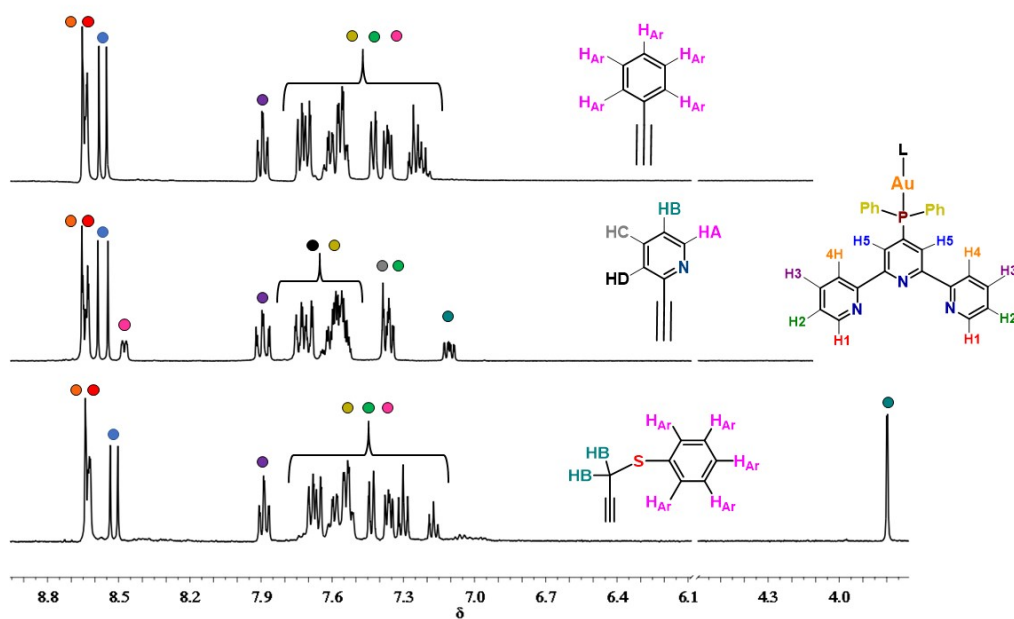

**Figure S6:**  $^1\text{H}$ -RMN (400 MHz  $d_2$ - $\text{CH}_2\text{Cl}_2$ ) of **4** (up) **5** (middle) and **6** (bottom).

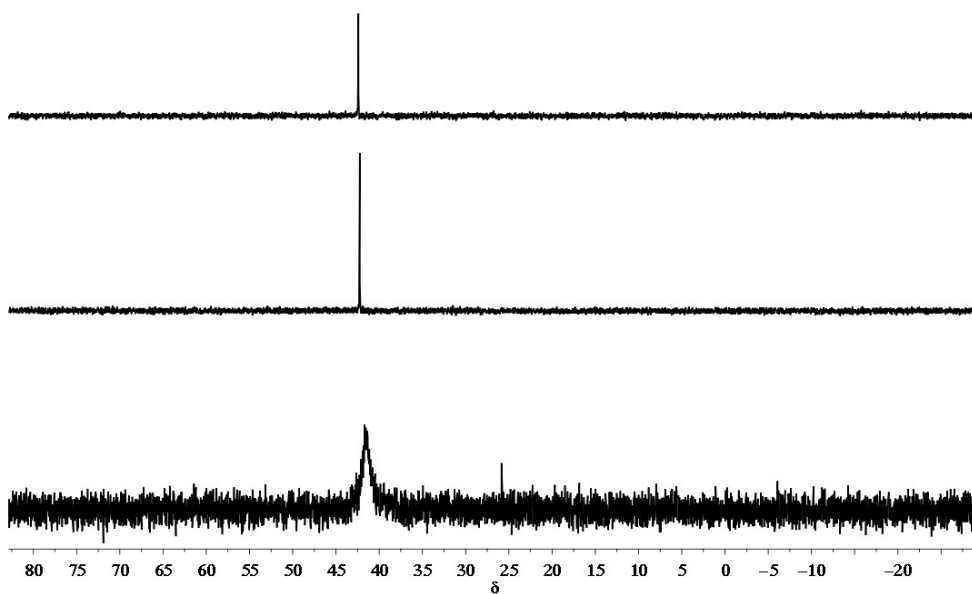

Figure S7:  $^{31}\text{P}\{^1\text{H}\}$ -RMN (162 MHz  $d_2$ - $\text{CH}_2\text{Cl}_2$ ) of **4** (up) **5** (middle) and **6** (bottom).

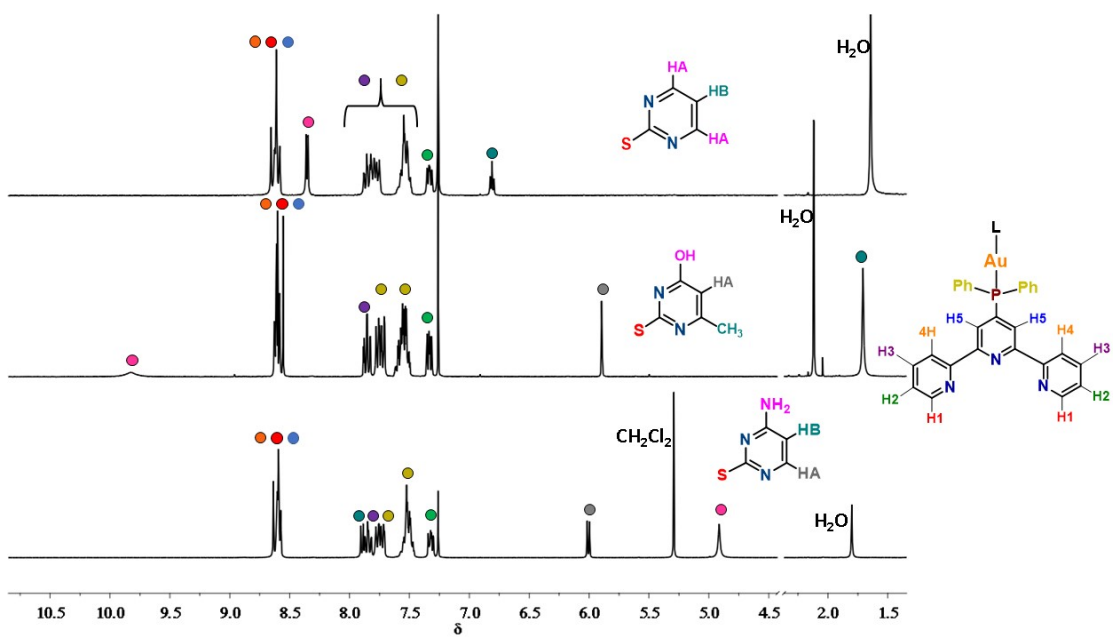

Figure S8:  $^1\text{H}$ -RMN (400 MHz  $d_1$ - $\text{CHCl}_3$ ) of **7** (up) **8** (middle) and **9** (bottom).

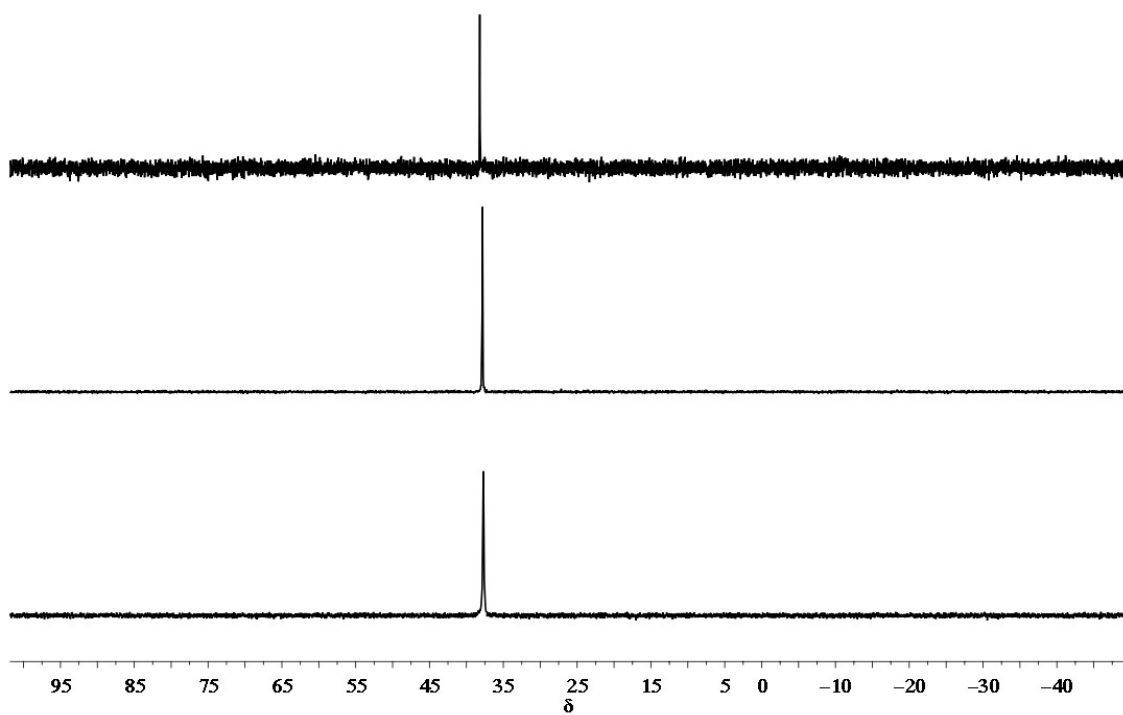

**Figure S9:**  $^{31}\text{P}\{^1\text{H}\}$ -RMN (162 MHz  $d_1$ - $\text{CHCl}_3$ ) of **7** (up) **8** (middle) and **9** (bottom).

## 2 Stability studies

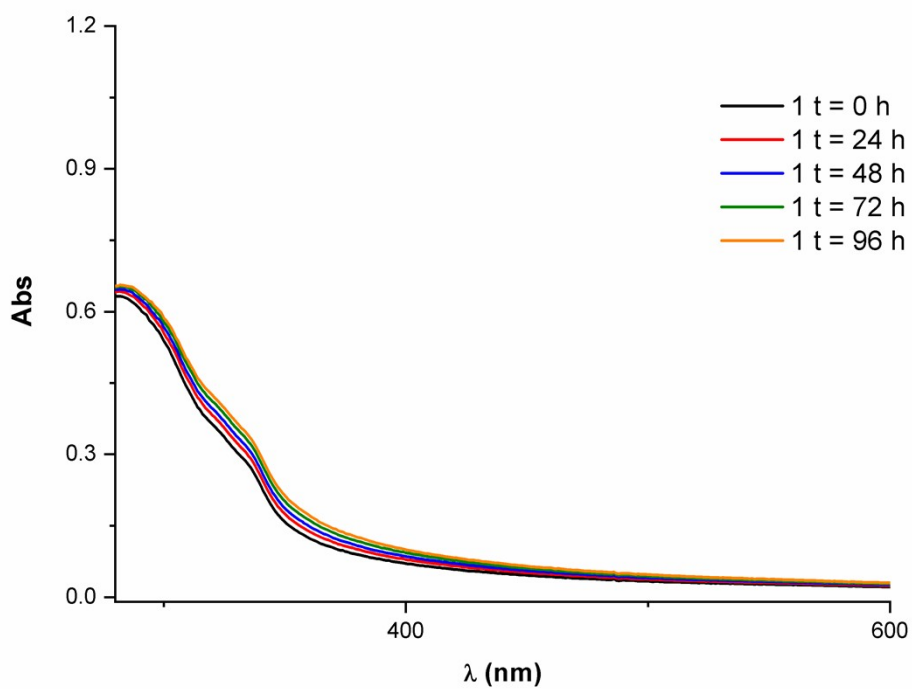

Figure S10: Stability study of **1** in a mixture of PBS/DMF (10%).

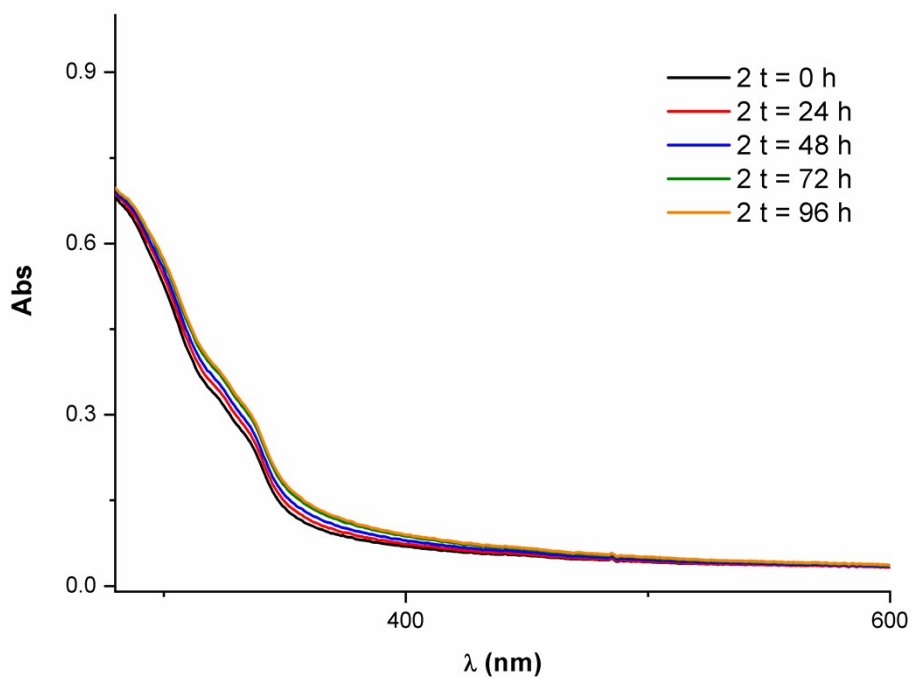

Figure S11: Stability study of **2** in a mixture of PBS/DMF (10%).

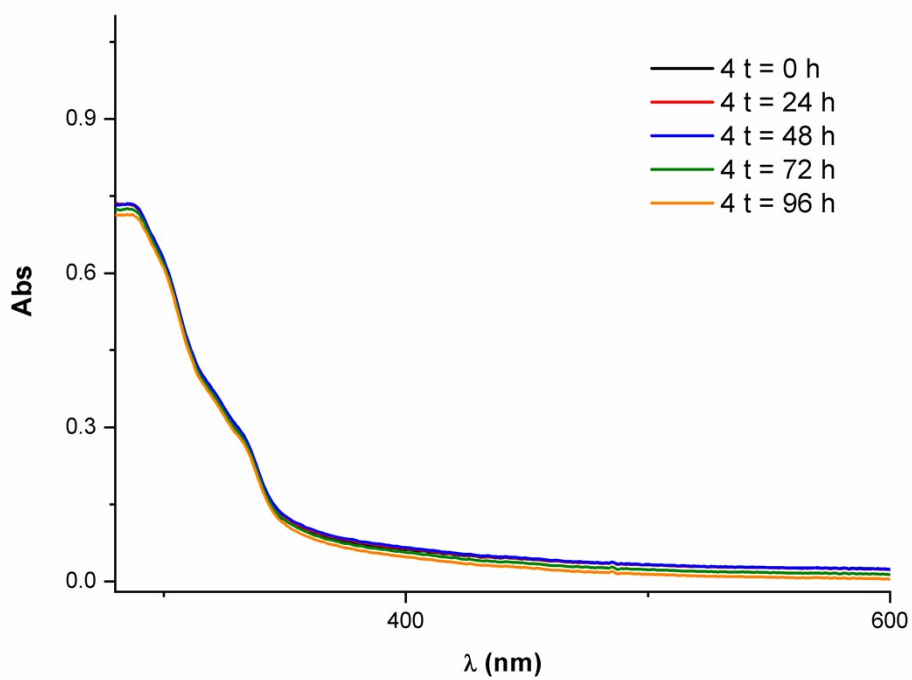

Figure S12: Stability study of 4 in a mixture of PBS/DMF (10%).

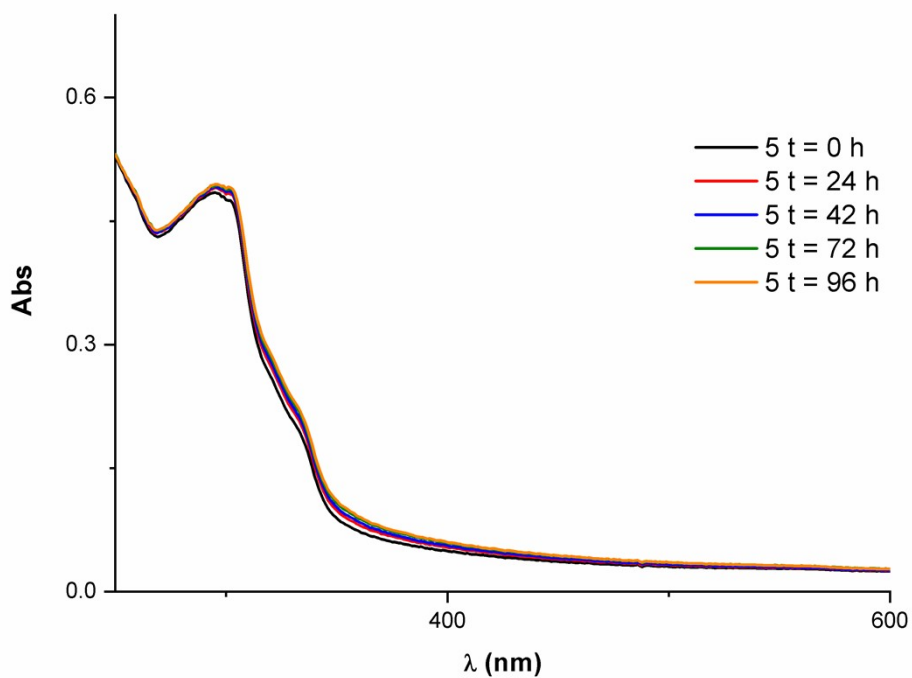

Figure S13: Stability study of 5 in a mixture of PBS/DMF (10%).



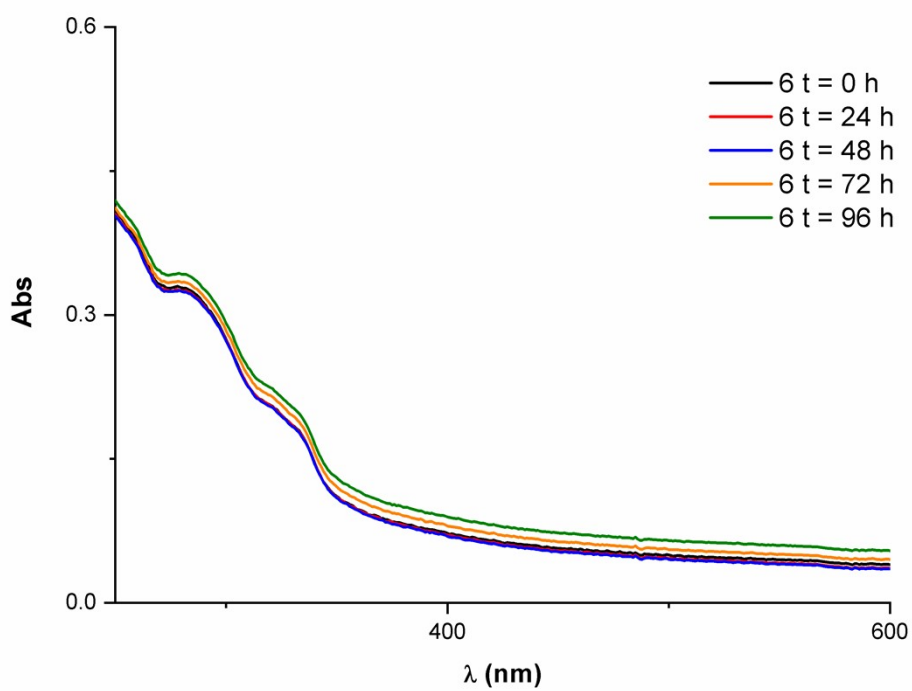

Figure S14: Stability study of 6 in a mixture of PBS/DMF (10%).

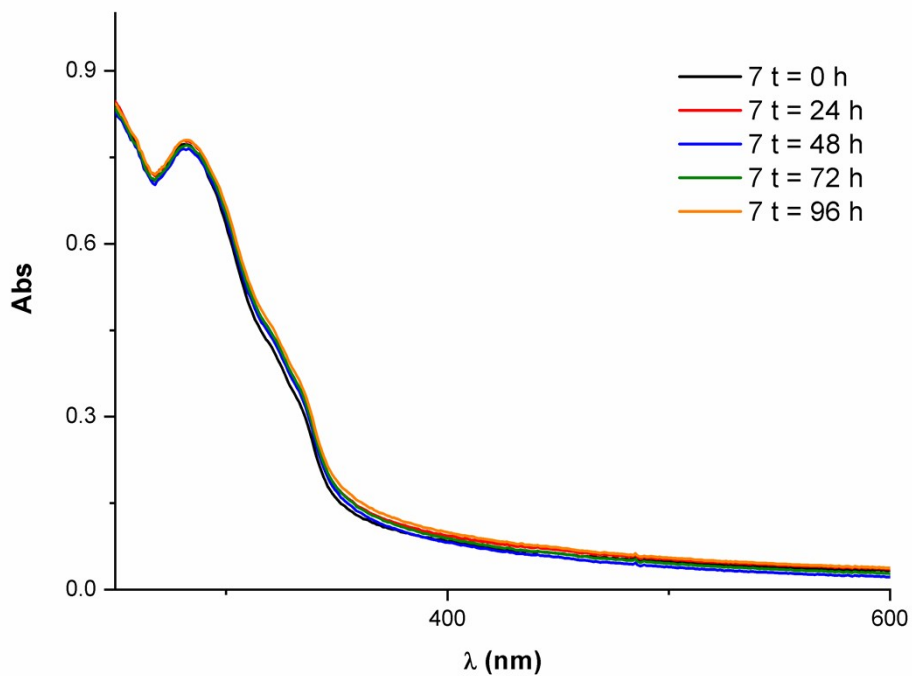

Figure S15: Stability study of Au-7 in a mixture of PBS/DMF (10%).

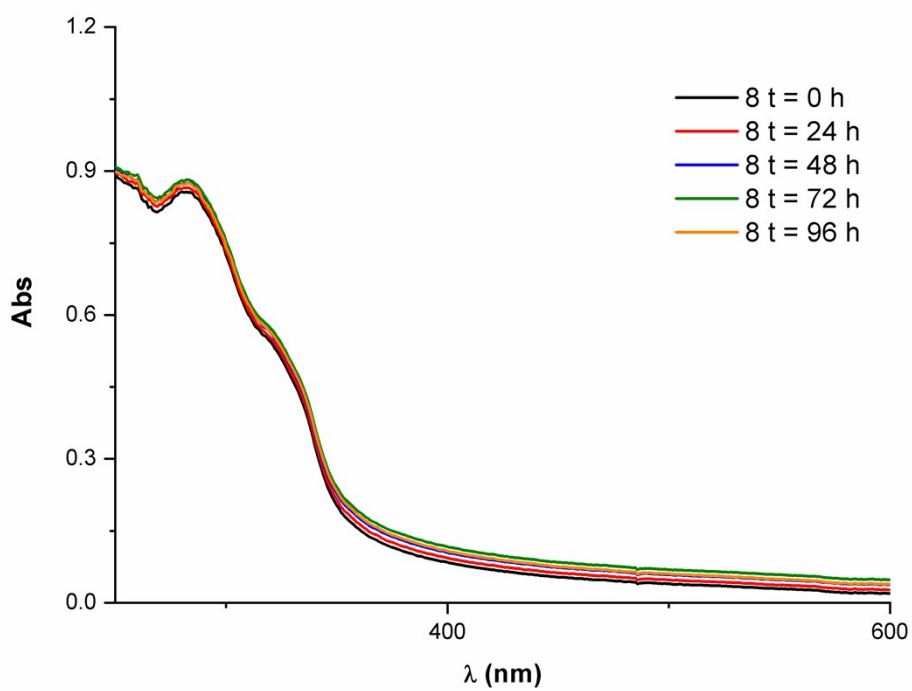

Figure S16: Stability study of **8** in a mixture of PBS/DMF (10%).

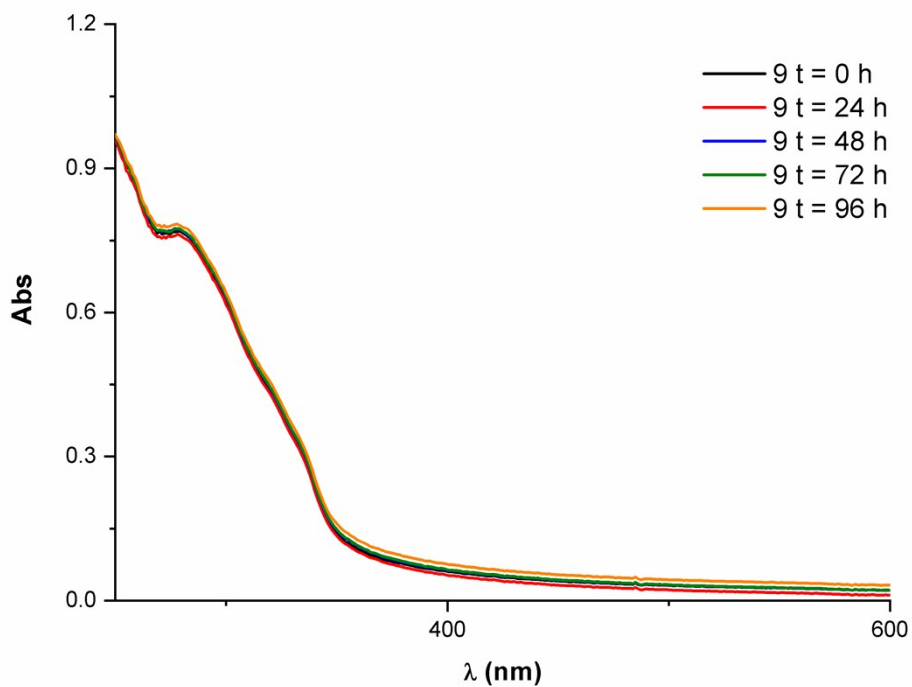

Figure S17: Stability study of **9** in a mixture of PBS/DMF (10%).

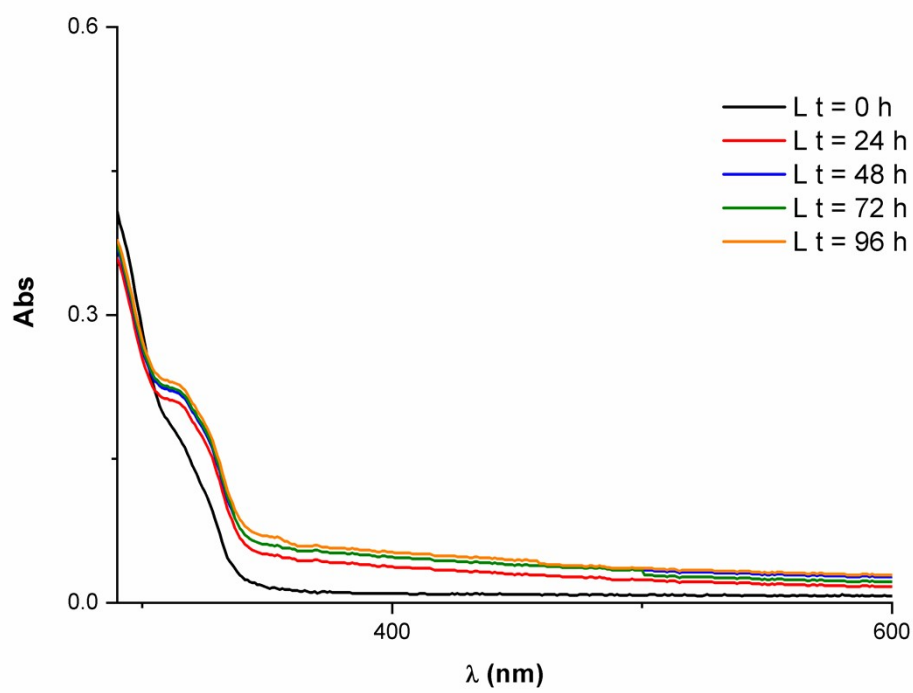

**Figure S18:** Stability study of L in a mixture of PBS/DMF (10%).

### 3 Ligand exchange reactions $^1\text{H-NMR}$ and $^{31}\text{P}\{^1\text{H}\}$ NMR

$[\text{Au}(\text{PPh}_2(\text{C}_6\text{H}_4\text{COOH}))(\text{4}'\text{-PPh}_2\text{terpy})]\text{BF}_4$  (**2**)

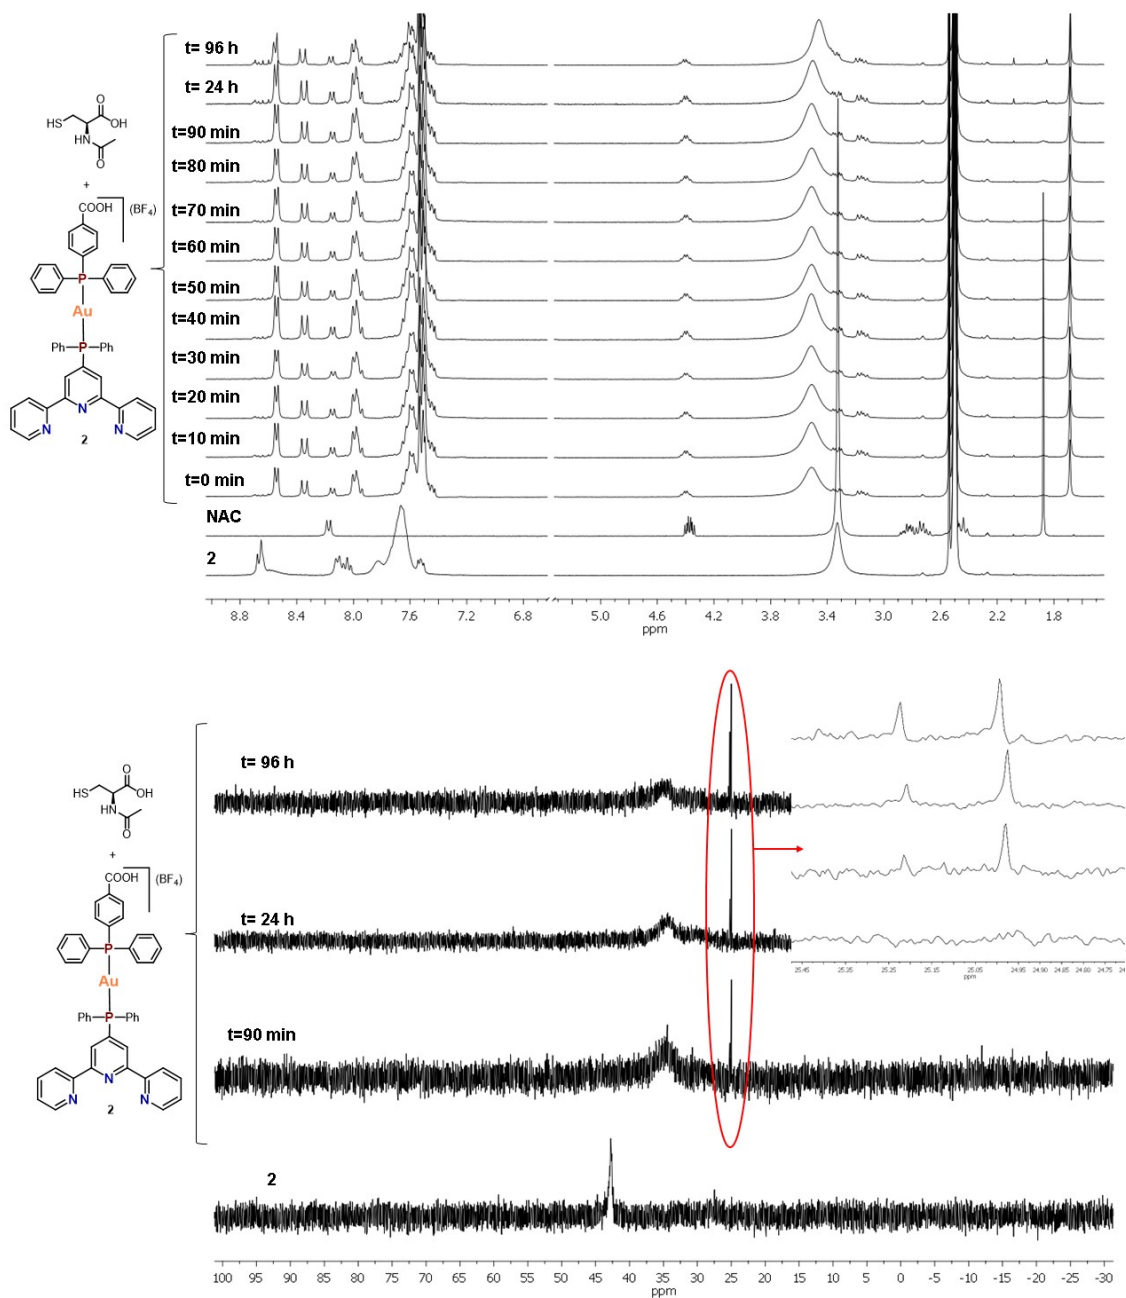

**Figure S19:**  $^1\text{H-NMR}$  (300 MHz  $d_6$ -DMSO) (up) and  $^{31}\text{P}\{^1\text{H}\}$ -NMR (121 MHz  $d_6$ -DMSO) (bottom) of **2** (10 mM) in presence of NAC (10 mM) at different times.

[AuCl(4'-PPh<sub>2</sub>terpy)] (**3**)

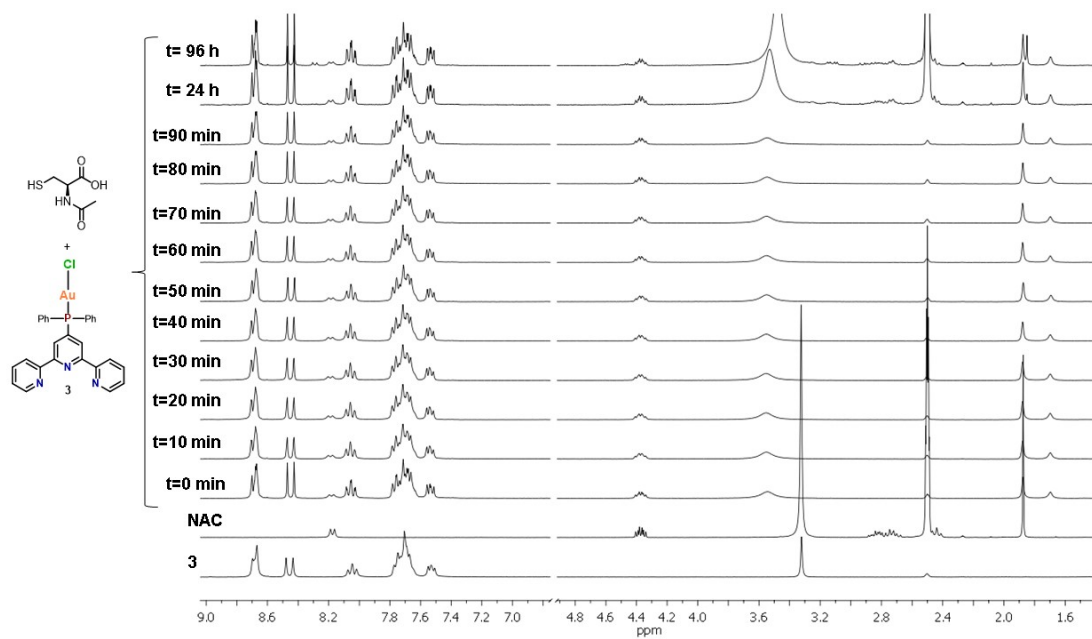

**Figure S20:** <sup>1</sup>H-RMN (300 MHz d<sub>6</sub>-DMSO) of **3** (10 mM) in presence of NAC (10 mM) at different times.

[Au(C≡CPh)(4'-PPh<sub>2</sub>terpy)] (**4**)

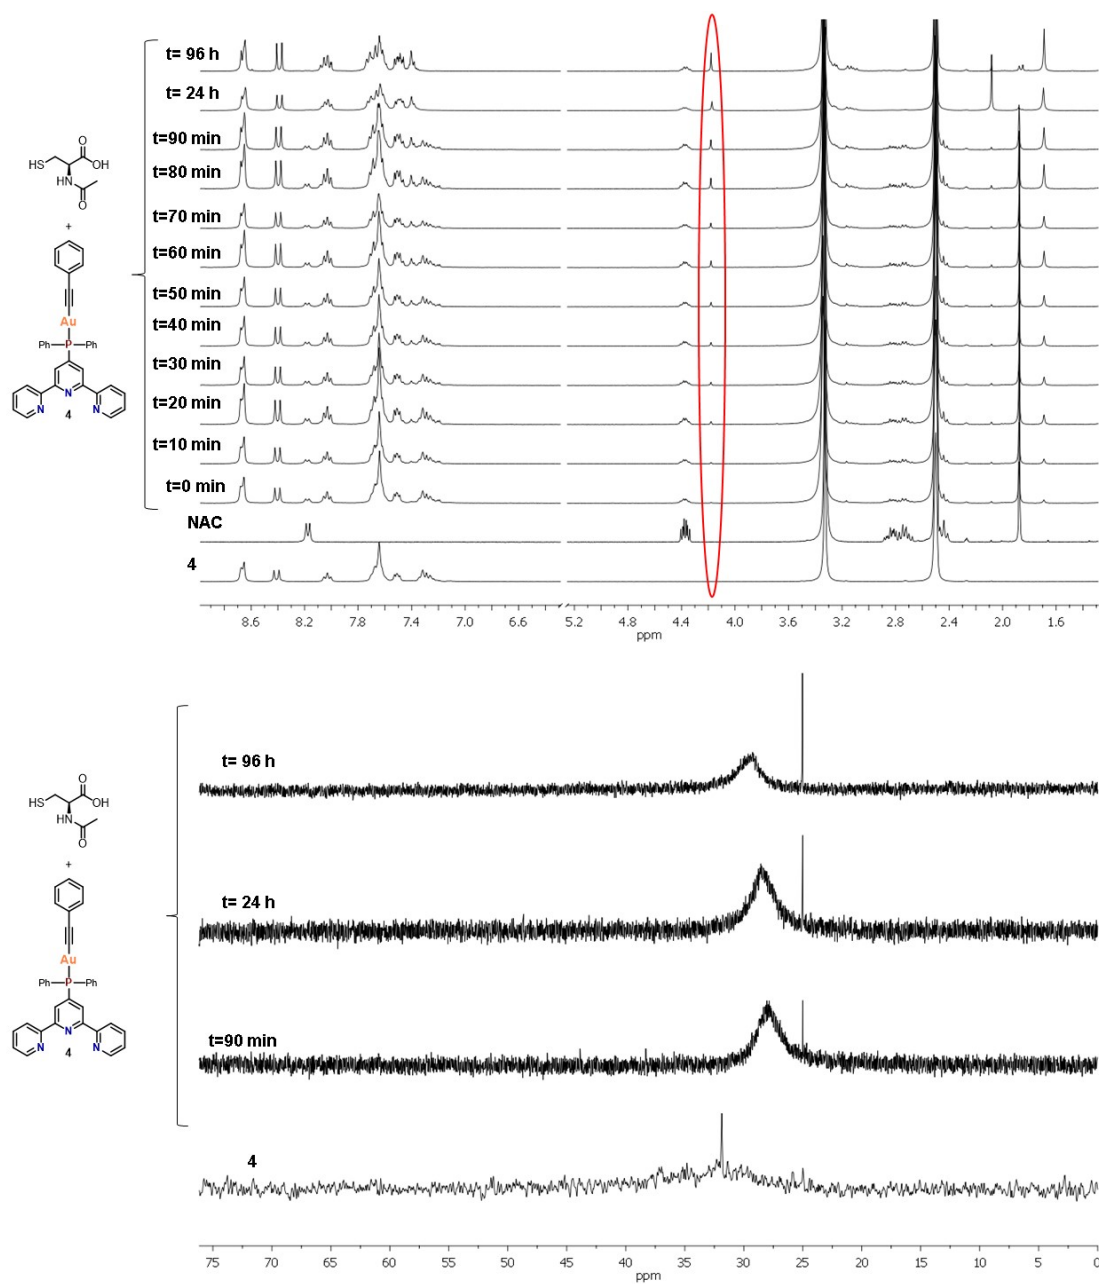

**Figure S21:** <sup>1</sup>H-RMN (300 MHz d<sub>6</sub>-DMSO) (up) and <sup>31</sup>P{<sup>1</sup>H}-RMN (121 MHz d<sub>6</sub>-DMSO) (bottom) of **4** in presence of NAC at different times.

[Au(SPyrin)(4'-PPh<sub>2</sub>terpy)] (7):

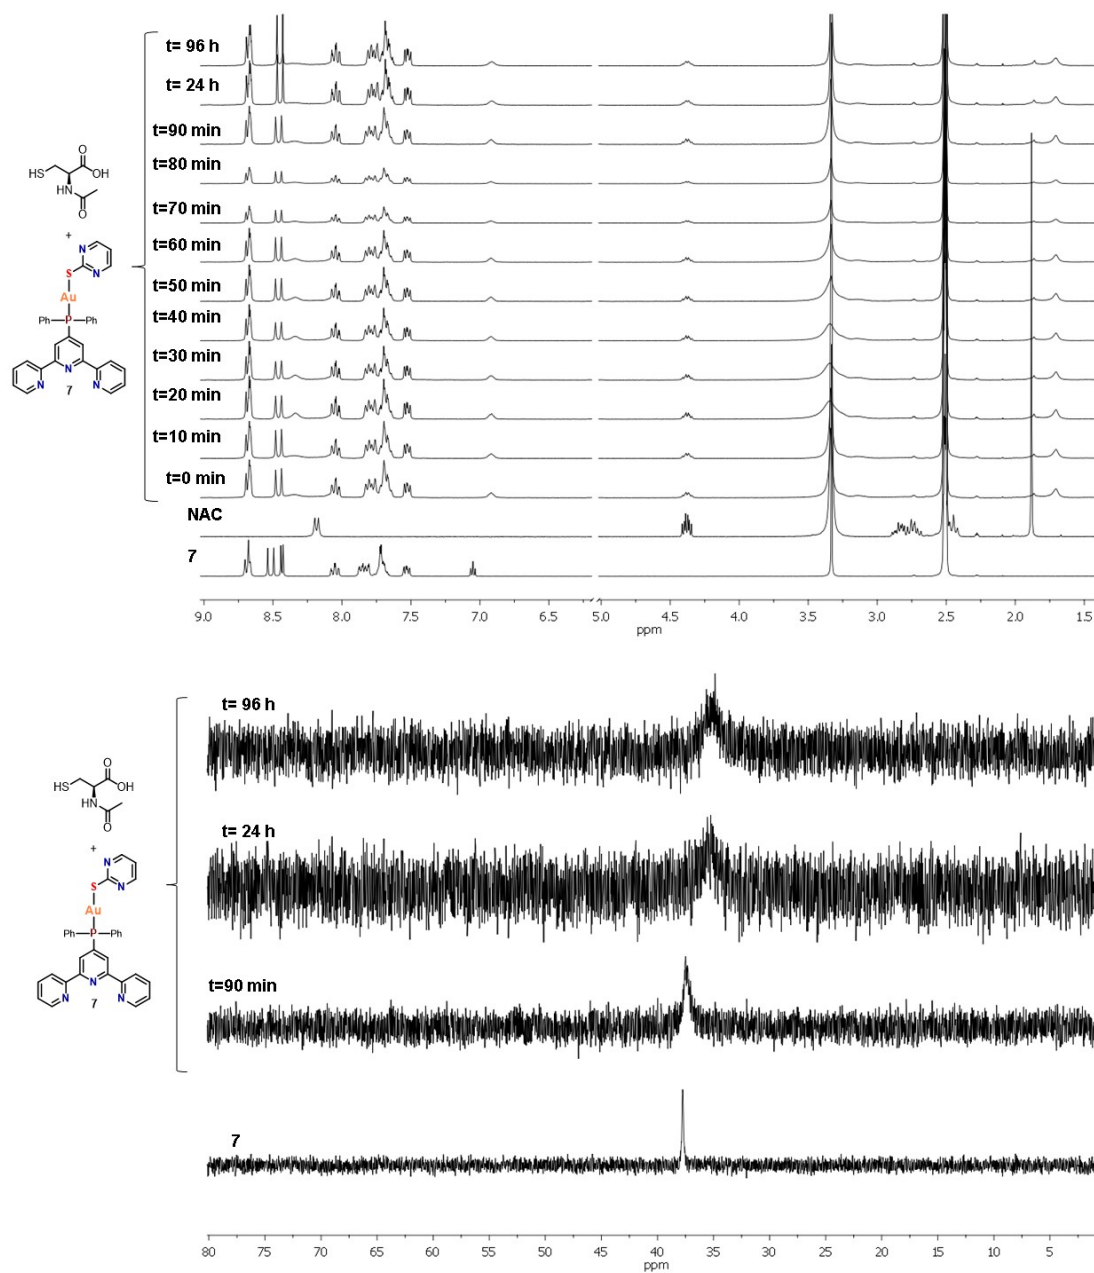

**Figure S22:** <sup>1</sup>H-RMN (300 MHz d<sub>6</sub>-DMSO) (up) and <sup>31</sup>P{<sup>1</sup>H}-RMN (121 MHz d<sub>6</sub>-DMSO) (bottom) of 7 in presence of NAC at different times.

4'-PPh<sub>2</sub>terpy (L):

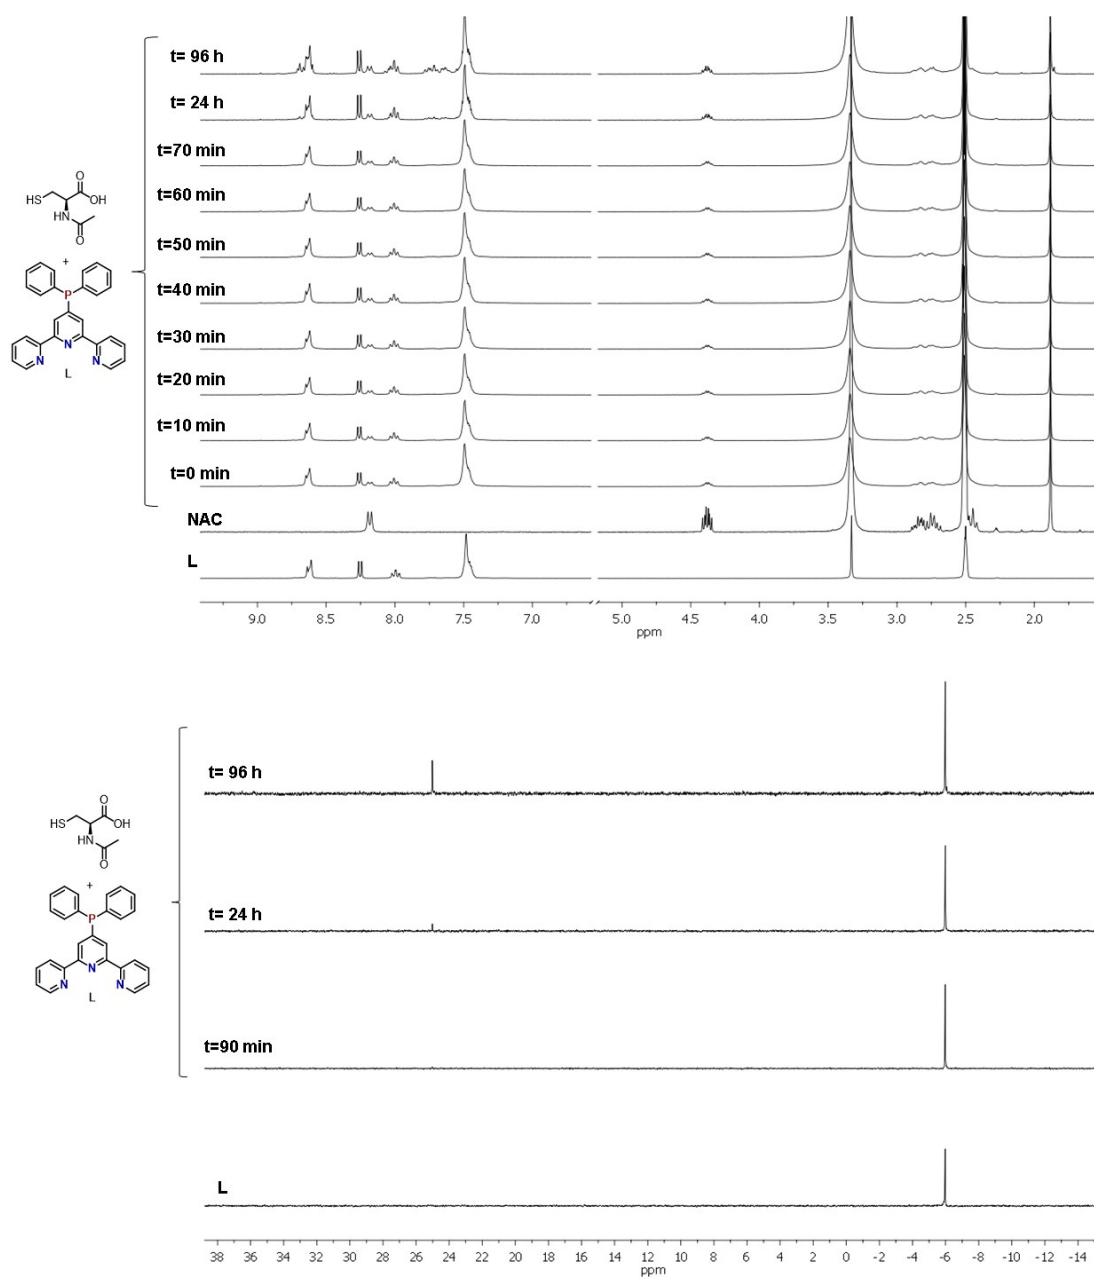

**Figure S23:** <sup>1</sup>H-RMN (300 MHz d<sub>6</sub>-DMSO) (up) and <sup>31</sup>P{<sup>1</sup>H}-RMN (121 MHz d<sub>6</sub>-DMSO) (bottom) of L in presence of NAC at different times.



#### 4 DNA-Binding

4'-PPH<sub>2</sub>terpy:

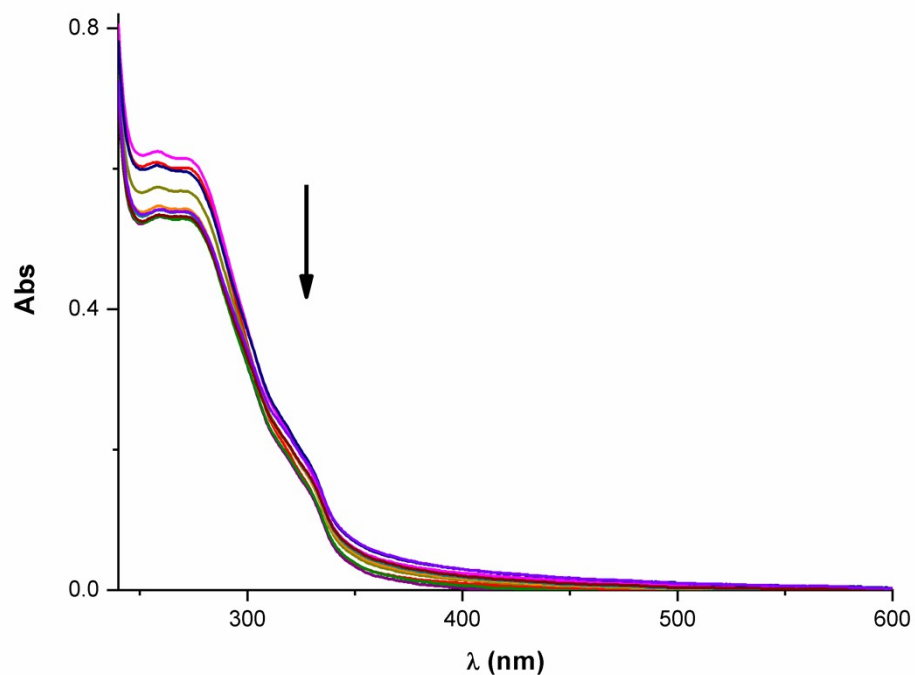

**Figure S24:** UV-Vis Absorption spectral titration of 4'-PPH<sub>2</sub>terpy in presence of incremental amounts of CT-DNA.

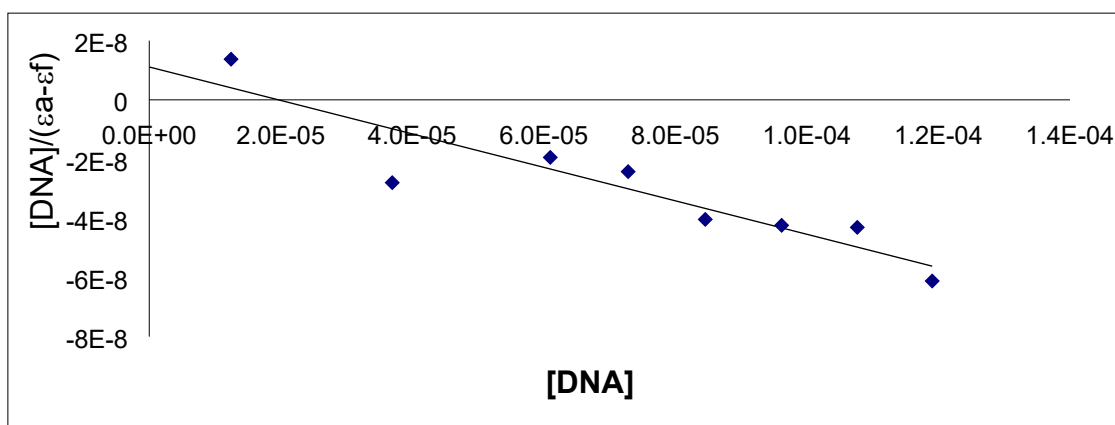

**Figure S24a:** graphical representation of Wolfe-Shimer equation at 260 nm

[Au(PPh<sub>2</sub>(C<sub>6</sub>H<sub>4</sub>COOH))(4'-PPh<sub>2</sub>terpy)]BF<sub>4</sub> (**2**)

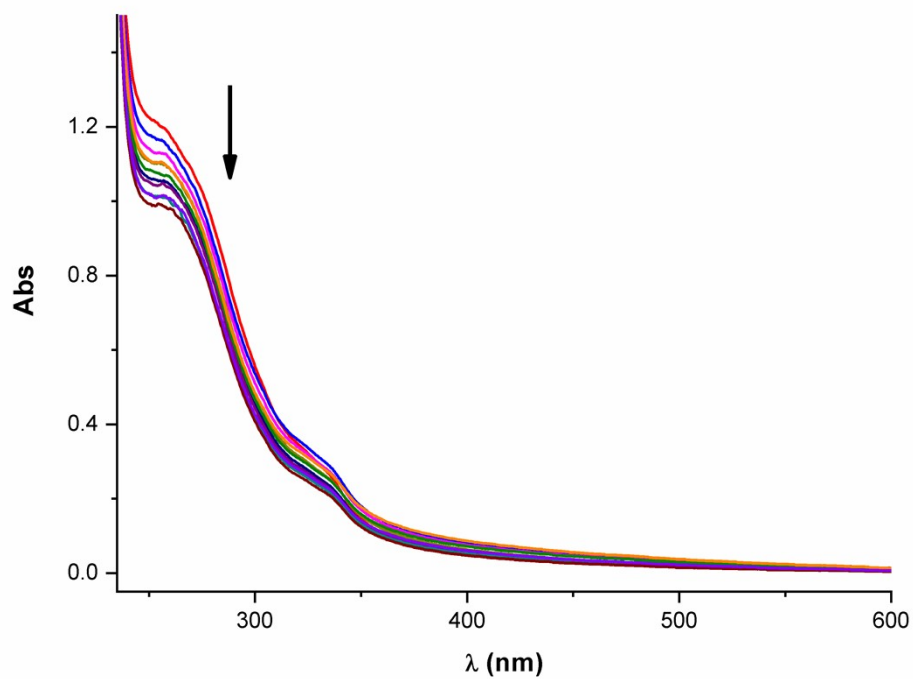

**Figure S25:** UV-Vis Absorption spectral titration of **2** in presence of incremental amounts of CT-DNA.

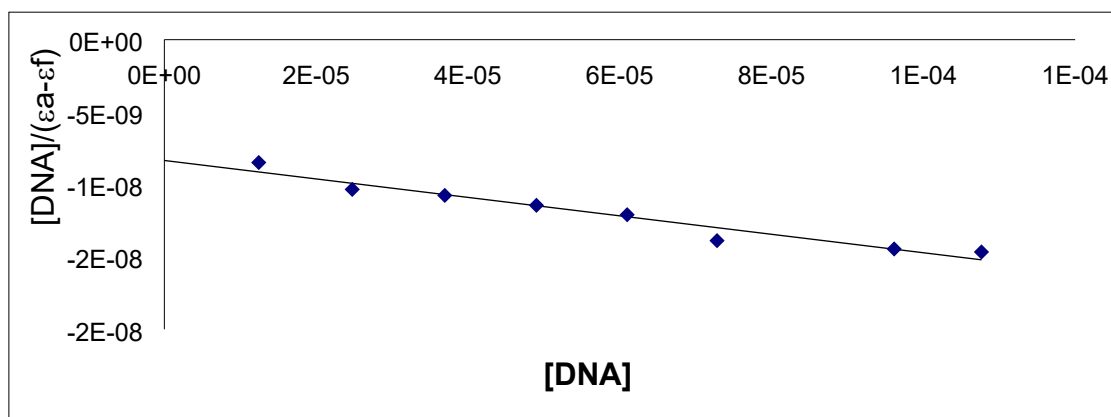

**Figure S25a:** graphical representation of Wolfe-Shimer equation at 260 nm

[AuCl(4'-PPh<sub>2</sub>terpy)] (**3**)

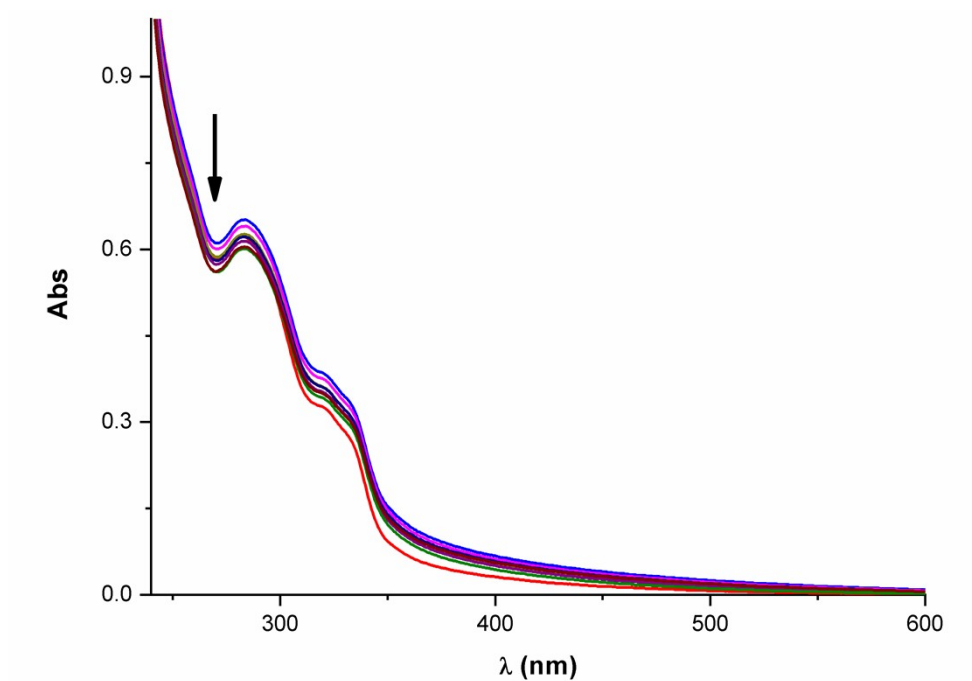

**Figure S26:** UV-Vis Absorption spectral titration of **3** in presence of incremental amounts of CT-DNA.

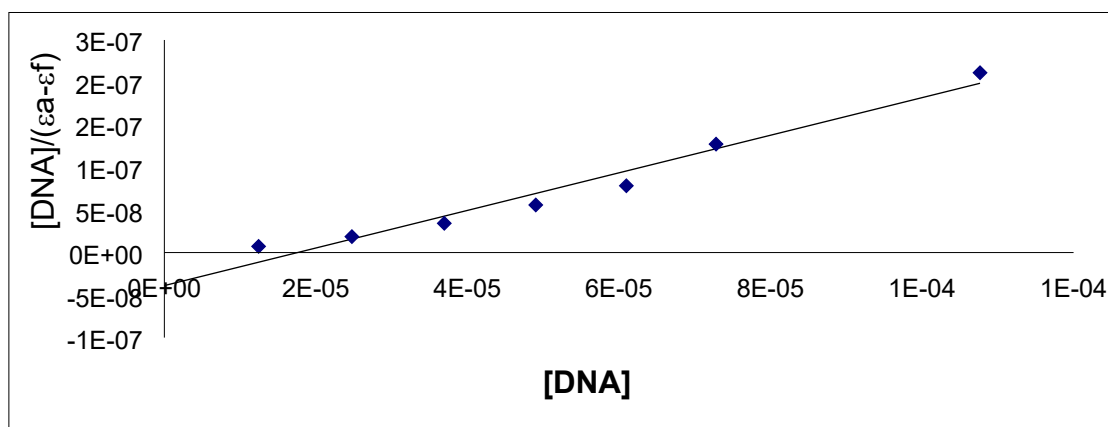

**Figure S26a:** graphical representation of Wolfe-Shimer equation at 284 nm

[Au(C≡CPh)(4'-PPh<sub>2</sub>terpy)] (**4**)

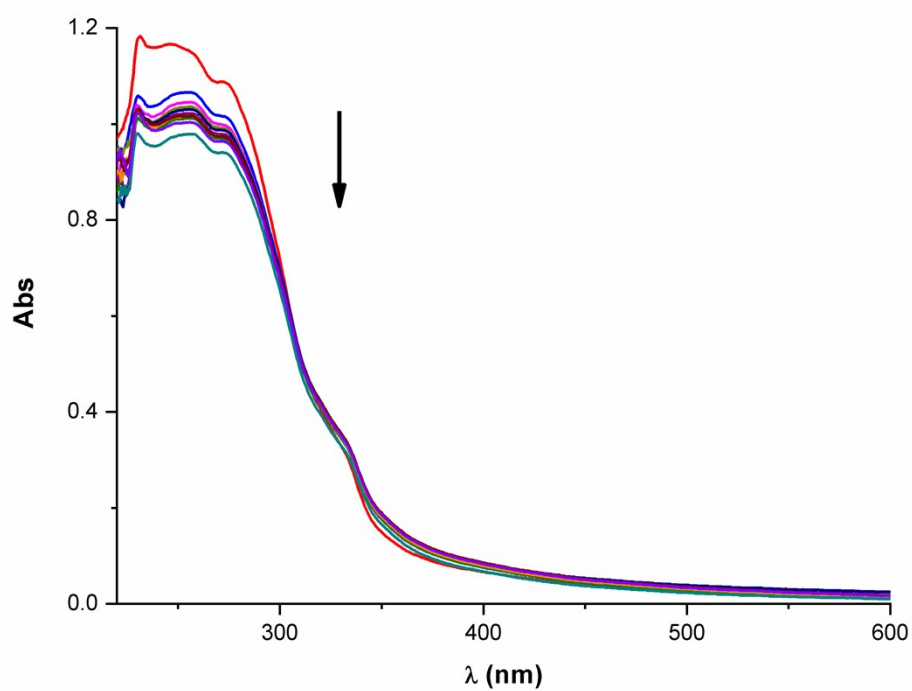

**Figure S27:** UV-Vis Absorption spectral titration of **4** in presence of incremental amounts of CT-DNA.

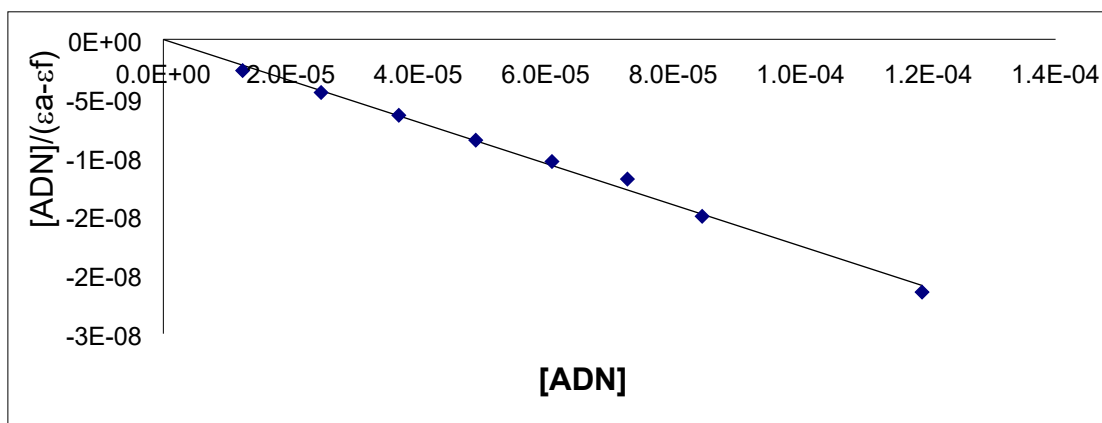

**Figure S27a:** graphical representation of Wolfe-Shimer equation at 250 nm

[Au(SPyrin)(4'-PPh<sub>2</sub>terpy)] (**7**):

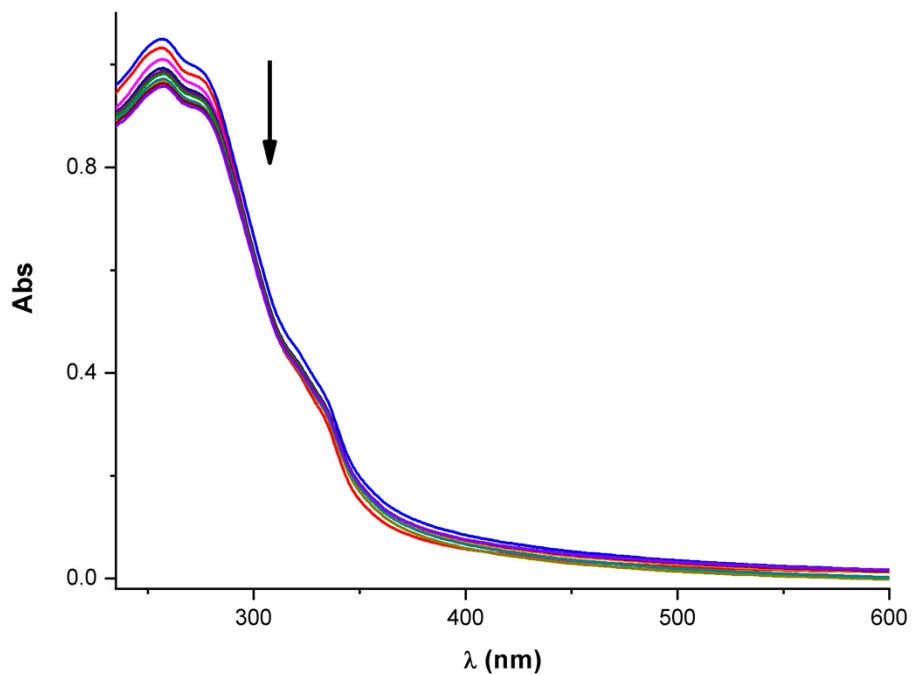

**Figure S28:** UV-Vis Absorption spectral titration of **7** in presence of incremental amounts of CT-DNA.

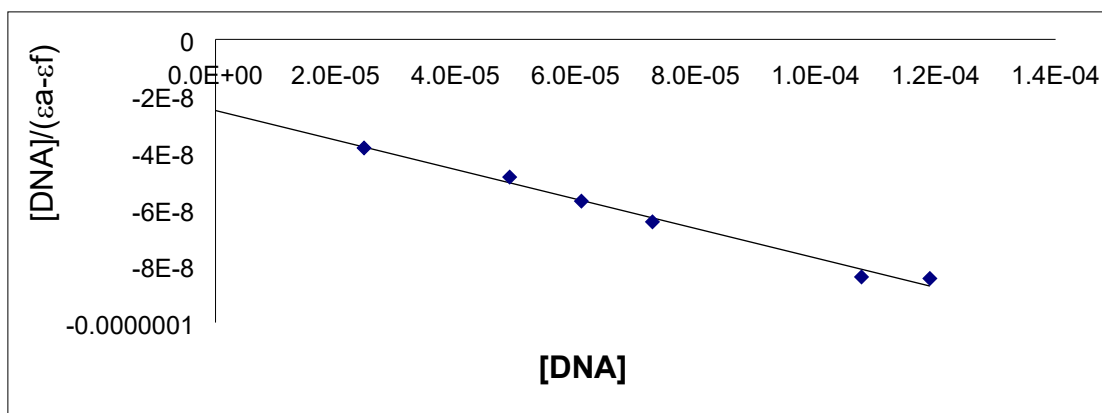

**Figure S28a:** graphical representation of Wolfe-Shimer equation at 256 nm

## 5 Flow cytometry

Cell death Studies:

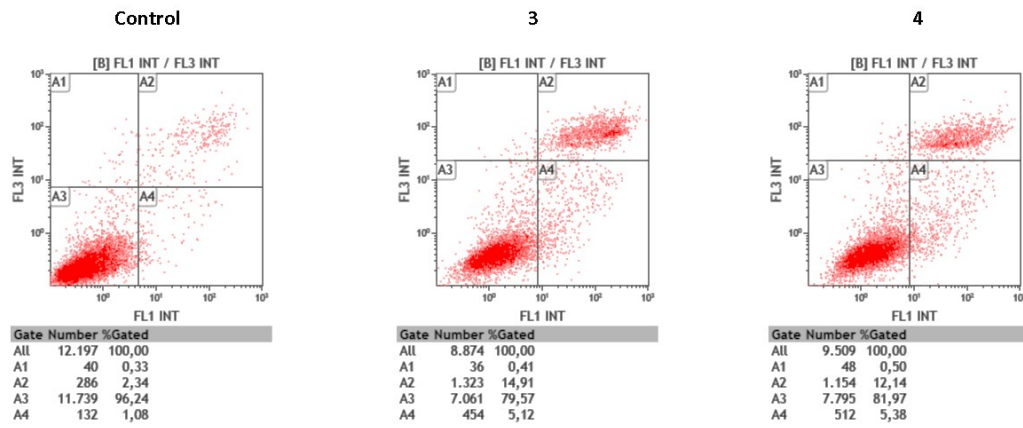

**Figure S29:** Flow cytometry of MDA-MB-231 cells after incubation for 48 hours with complexes **3** and **4**. Study of cell death mechanism.

Cellular cycle arrest:

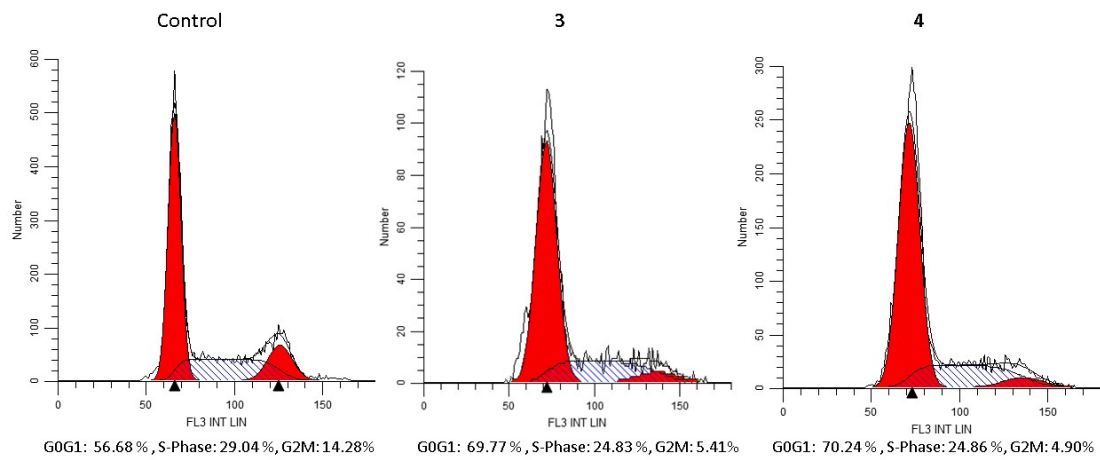

**Figure S30:** Study DNA content of MDA-MB-231 cells after incubation for 48 hours with complexes **3** and **4**. Study of cell cycle arrest.

Michocondrial potential ( $\Delta\Psi$ ):

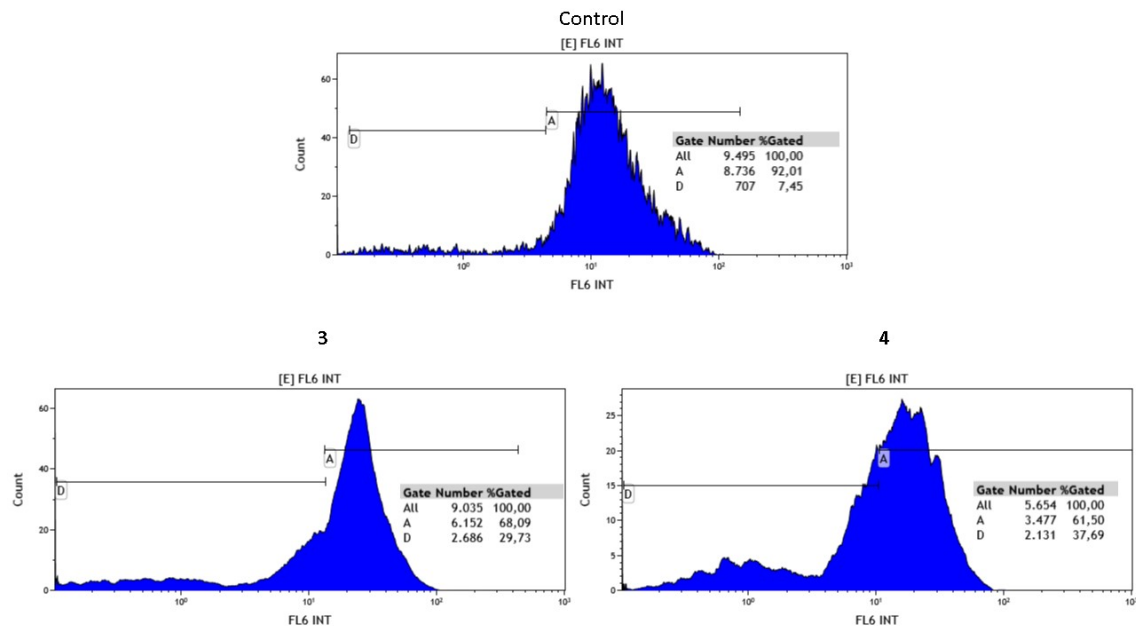

**Figure S31:** Study of mitochondrial  $\Delta\Psi$  of MDA-MB-231 cells after incubation for 48 hours with complexes **3** and **4**.
